# Supplementary material for: p53 orchestrates DNA replication restart homeostasis by suppressing mutagenic RAD52 and POLθ pathways
Source: eLife journal article supplement (doi:10.7554/elife.31723), 2018-01-15

## Figure 1 - figure supplement 1

- (A) DNA fibers analysis of newly initiated forks of p53 null and WT HAP-1 cells with replication stalling (HU, 200 $\mu$ M).
- (B) DNA fibers analysis of newly initiated forks of primary MEF with WT, GOF p53 R172P and p53 R172H cells with replication stalling (HU, 300 $\mu$ M).
- (C) Expression of p53 S47 and p53 WT suppress proliferation compared to primary MEF without p53 as measured by MTT proliferation assay, consistent with intact cell cycle checkpoint functions in the mutant.
- (D) Doxycycline induced expression of WT and mutant p53 S47 in H1299 cells.

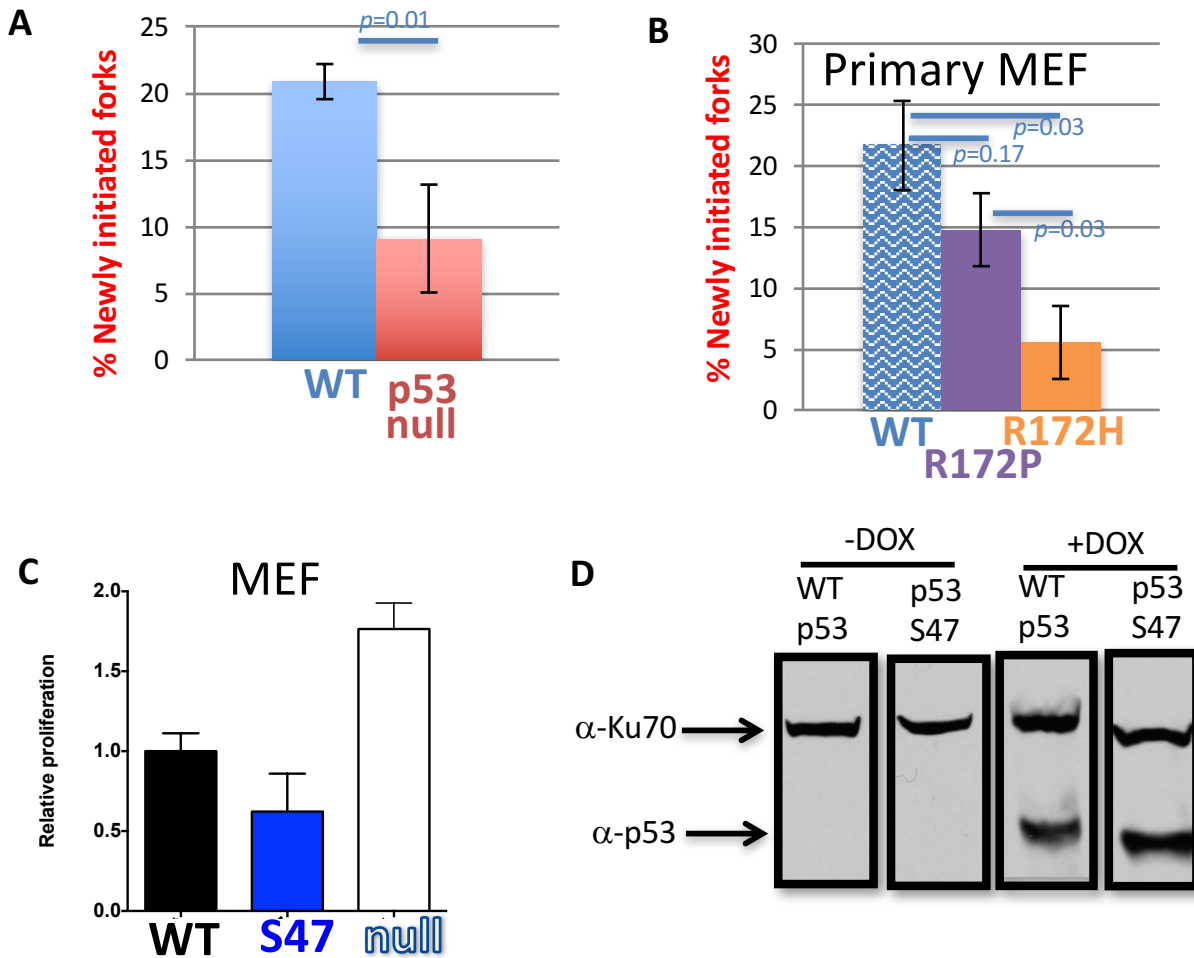

Supplement: supp [file elife_poa_e31723_Figure_1_figure_supplement_1.pdf › elife_poa_e31723_Figure_1_figure_supplement_1.pdf]
