# Supplementary material for: p53 orchestrates DNA replication restart homeostasis by suppressing mutagenic RAD52 and POLθ pathways
Source: eLife journal article supplement (doi:10.7554/elife.31723), 2018-01-15

## Figure 2 - figure supplement 1

p53 null MCF10A cells show similar sensitivity to mitomycin C compared to WT p53 MCF10A cells.

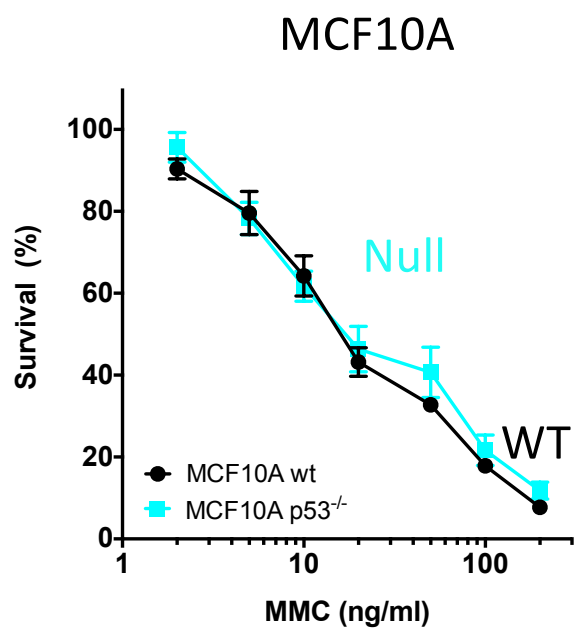

Supplement: supp [file elife_poa_e31723_Figure_2_figure_supplement_1.pdf › elife_poa_e31723_Figure_2_figure_supplement_1.pdf]
