# Supplementary material for: p53 orchestrates DNA replication restart homeostasis by suppressing mutagenic RAD52 and POLθ pathways
Source: eLife journal article supplement (doi:10.7554/elife.31723), 2018-01-15

### Figure 3 - figure supplement 1

Quantitation of MRE11-SIRF in unperturbed HAP-1 p53 null and WT cells. Bars represent the mean and the 95% confidence interval. Significance values are derived from student T-test analysis normalized to the respective EdU-PLA intensities (Table 1).

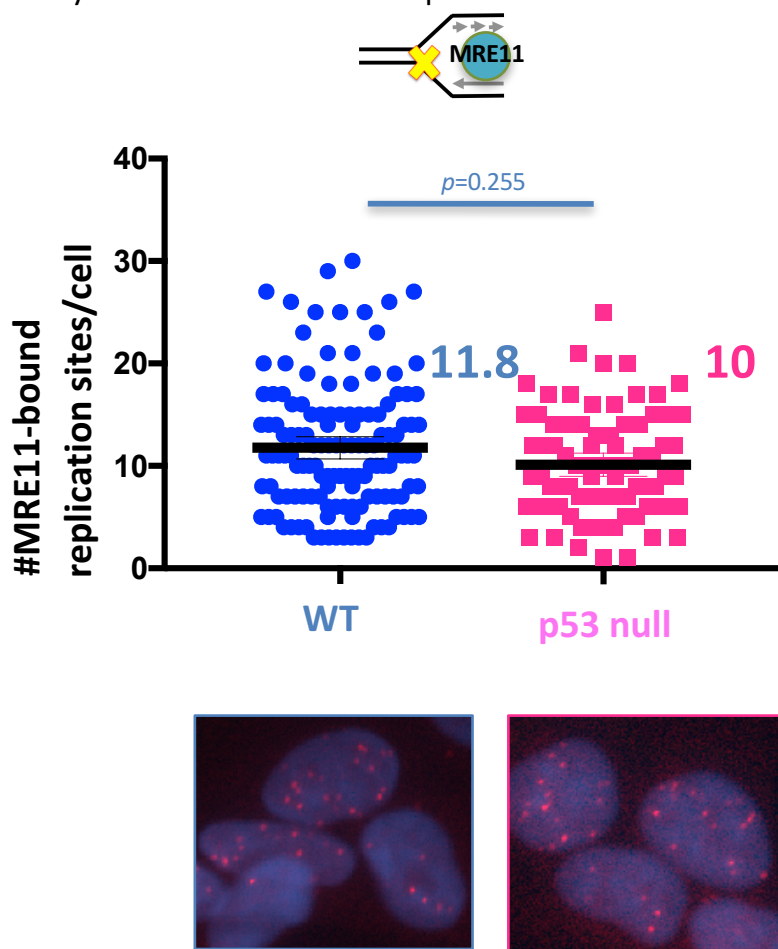

Supplement: supp [file elife_poa_e31723_Figure_3_figure_supplement_1.pdf › elife_poa_e31723_Figure_3_figure_supplement_1.pdf]
