# Supplementary material for: p53 orchestrates DNA replication restart homeostasis by suppressing mutagenic RAD52 and POLθ pathways
Source: eLife journal article supplement (doi:10.7554/elife.31723), 2018-01-15

**Figure 5 - figure supplement 1**

PLA assay between RAD52 and POLθ in p53 R248W and WT p53 HCT116 cells. Bars represent the mean and the 95% confidence interval. Significance values are derived from student T-test analysis normalized to the respective EdU-PLA intensities (Table 1).

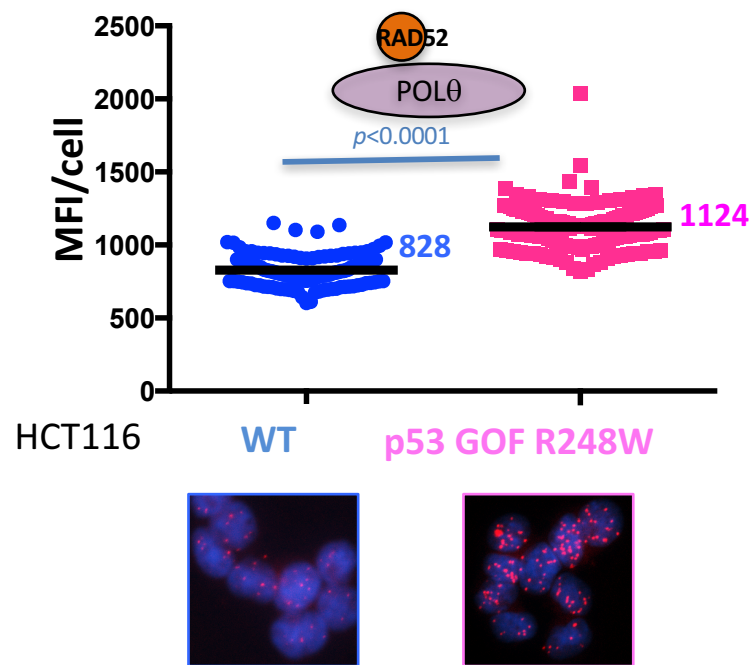

Supplement: supp [file elife_poa_e31723_Figure_5_figure_supplement_1.pdf › elife_poa_e31723_Figure_5_figure_supplement_1.pdf]
