# Supplementary material for: p53 orchestrates DNA replication restart homeostasis by suppressing mutagenic RAD52 and POLθ pathways
Source: eLife journal article supplement (doi:10.7554/elife.31723), 2018-01-15

**Figure 6 - figure supplement 1**

(A) Color key histogram showing the distribution of the similarity score  
(B) Hierarchical clustering of cosmic mutation signatures in p53 defective and proficient breast cancer from TCGA database.

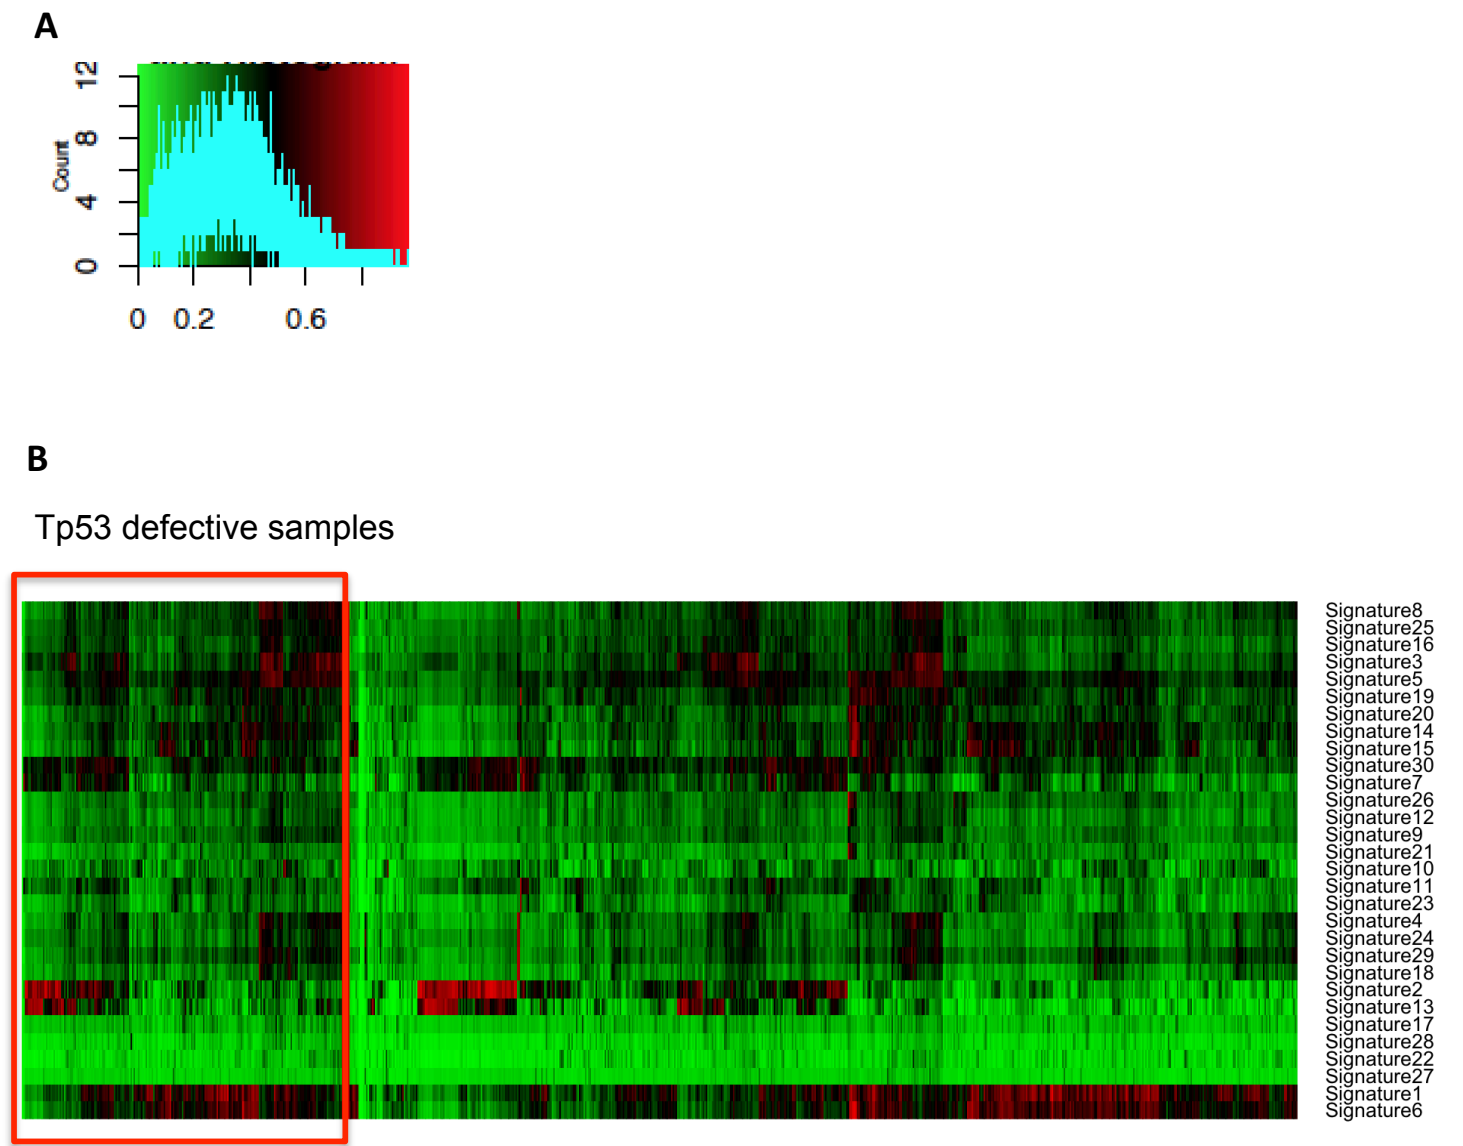

Supplement: supp [file elife_poa_e31723_Figure_6_figure_supplement_1.pdf › elife_poa_e31723_Figure_6_figure_supplement_1.pdf]
